# Myocardial Chemokine Expression and Intensity of Myocarditis in Chagas Cardiomyopathy Are Controlled by Polymorphisms in *CXCL9* and *CXCL10*

Luciana Gabriel Nogueira<sup>1,2,3</sup>, Ronaldo Honorato Barros Santos<sup>4</sup>, Barbara Maria Ianni<sup>5</sup>, Alfredo Inácio Fiorelli<sup>4</sup>, Eliane Conti Mairena<sup>1,2,3</sup>, Luiz Alberto Benvenuti<sup>6</sup>, Amanda Frade<sup>1,2,3</sup>, Eduardo Donadi<sup>7</sup>, Fabrício Dias<sup>7</sup>, Bruno Saba<sup>8</sup>, Hui-Tzu Lin Wang<sup>8</sup>, Abilio Fragata<sup>8</sup>, Marcelo Sampaio<sup>8</sup>, Mario Hiroyuki Hirata<sup>8</sup>, Paula Buck<sup>5</sup>, Charles Mady<sup>5</sup>, Edimar Alcides Bocchi<sup>9</sup>, Noedir Antonio Stolf<sup>4</sup>, Jorge Kalil<sup>1,2,3</sup>, Edecio Cunha-Neto<sup>1,2,3\*</sup>

**1** Laboratory of Immunology, Heart Institute (InCor), School of Medicine, University of São Paulo, São Paulo, Brazil, **2** Division of Clinical Immunology and Allergy, School of Medicine, University of São Paulo, São Paulo, Brazil, **3** Institute for Investigation in Immunology (iii), INCT, São Paulo, Brazil, **4** Division of Surgery, Heart Institute (InCor), School of Medicine, University of São Paulo, São Paulo, Brazil, **5** Myocardopathies Unit, Heart Institute (InCor), School of Medicine, University of São Paulo, São Paulo, Brazil, **6** Division of Pathology, Heart Institute (InCor), School of Medicine, University of São Paulo, São Paulo, Brazil, **7** School of Medicine of Ribeirão Preto (FMRP), University of São Paulo, São Paulo, Brazil, **8** Dante Pazzanese Institute of Cardiology and Heart Failure Unit, São Paulo, Brazil, **9** Transplantation and Heart Failure Unit, Heart Institute (InCor), School of Medicine, University of São Paulo, São Paulo, Brazil

## Abstract

**Background:** Chronic Chagas cardiomyopathy (CCC), a life-threatening inflammatory dilated cardiomyopathy, affects 30% of the approximately 8 million patients infected by *Trypanosoma cruzi*. Even though the Th1 T cell-rich myocarditis plays a pivotal role in CCC pathogenesis, little is known about the factors controlling inflammatory cell migration to CCC myocardium.

**Methods and Results:** Using confocal immunofluorescence and quantitative PCR, we studied cell surface staining and gene expression of the CXCR3, CCR4, CCR5, CCR7, CCR8 receptors and their chemokine ligands in myocardial samples from end-stage CCC patients. CCR5+, CXCR3+, CCR4+, CCL5+ and CXCL9+ mononuclear cells were observed in CCC myocardium. mRNA expression of the chemokines CCL5, CXCL9, CXCL10, CCL17, CCL19 and their receptors was upregulated in CCC myocardium. CXCL9 mRNA expression directly correlated with the intensity of myocarditis, as well as with mRNA expression of CXCR3, CCR4, CCR5, CCR7, CCR8 and their ligands. We also analyzed single-nucleotide polymorphisms for genes encoding the most highly expressed chemokines and receptors in a cohort of Chagas disease patients. CCC patients with ventricular dysfunction displayed reduced genotypic frequencies of *CXCL9* rs10336 CC, *CXCL10* rs3921 GG, and increased *CCR5* rs1799988CC as compared to those without dysfunction. Significantly, myocardial samples from CCC patients carrying the *CXCL9/CXCL10* genotypes associated to a lower risk displayed a 2–6 fold reduction in mRNA expression of CXCL9, CXCL10, and other chemokines and receptors, along with reduced intensity of myocarditis, as compared to those with other *CXCL9/CXCL10* genotypes.

**Conclusions:** Results may indicate that genotypes associated to reduced risk in closely linked *CXCL9* and *CXCL10* genes may modulate local expression of the chemokines themselves, and simultaneously affect myocardial expression of other key chemokines as well as intensity of myocarditis. Taken together our results may suggest that *CXCL9* and *CXCL10* are master regulators of myocardial inflammatory cell migration, perhaps affecting clinical progression to the life-threatening form of CCC.

**Citation:** Nogueira LG, Santos RHB, Ianni BM, Fiorelli AI, Mairena EC, et al. (2012) Myocardial Chemokine Expression and Intensity of Myocarditis in Chagas Cardiomyopathy Are Controlled by Polymorphisms in *CXCL9* and *CXCL10*. *PLoS Negl Trop Dis* 6(10): e1867. doi:10.1371/journal.pntd.0001867

**Editor:** Mauricio Martins Rodrigues, Federal University of São Paulo, Brazil

**Received:** May 14, 2012; **Accepted:** September 3, 2012; **Published:** October 25, 2012

**Copyright:** © 2012 Nogueira et al. This is an open-access article distributed under the terms of the Creative Commons Attribution License, which permits unrestricted use, distribution, and reproduction in any medium, provided the original author and source are credited.

**Funding:** This research was supported by the Brazilian Council for Scientific and Technological Development (CNPq) and the São Paulo State Research Funding Agency (FAPESP). LGN is recipient of São Paulo State Research Funding Agency (FAPESP 05/54507-2 and FAPESP 08/58844-1) fellowship. ED, ECN, MHH, EAB, and JK are recipients of grants from the Brazilian Council for Scientific and Technological Development (CNPq). The funders had no role in study design, data collection and analysis, decision to publish, or preparation of the manuscript.

**Competing Interests:** The authors have declared that no competing interests exist.

\* E-mail: edecunha@usp.br

## Introduction

Approximately 8 million people are infected with the protozoan parasite *Trypanosoma cruzi* [1] in Central and South America, with

an estimated 300,000 cases in the USA alone. *T. cruzi* is a major cause of heart disease and cardiovascular-related deaths in endemic areas located in Latin America, with approximately 50,000 fatalities per year due to Chronic Chagas cardiomyopathy

## Author Summary

Chronic Chagas cardiomyopathy (CCC) is an inflammatory heart disease that affects millions in Latin America, and in growing numbers in USA and Europe. Survival among CCC patients is shorter than among patients with cardiomyopathy of non-inflammatory etiology. This suggests that the inflammatory cell influx plays an important pathogenic role in CCC. However, little is known about the factors that maintain this myocardial inflammation. We hypothesized that Th1 T cell-attracting chemokines, involved in driving leukocyte migration, could play a role in myocardial inflammation. Herein, we have analyzed expression of several chemokines and receptors in heart tissue from patients with CCC and controls. We found inflammatory cells expressing chemokines and receptors consistent with Th1 T cell influx into CCC myocardium. mRNA expression levels of the chemokine CXCL9 correlated with inflammation. We also studied whether genetic variations in these genes could be associated to CCC development. Polymorphisms in *CXCL9*, *CXCL10* and *CCR5* were associated to differential risk of progression to the more severe form of CCC. Polymorphisms of *CXCL9* and *CXCL10* were also associated to the intensity of myocardial inflammation and chemokine expression. These results suggest that such chemokines may be master regulators of myocardial inflammatory cell migration, perhaps affecting clinical progression to severe CCC.

(CCC) [2]. The high parasite load typical of the acute infection results in a strong innate and adaptive immune response against *T. cruzi*, leading to the control - but not the complete elimination - of tissue and blood parasitism, establishing a low-grade chronic persistent infection [3]. CCC is an inflammatory cardiomyopathy that affects approximately 30% of infected individuals and occurs 5–30 years after acute infection, while the remaining patients develop digestive disorders (5–10%) or remain asymptomatic (ASY, 60–70%) [4]. It has been observed that the occurrence of myocarditis is correlated with clinical severity, ASY patients having minimal inflammation, while patients with advanced CCC display frequent and intense myocarditis [5]. Approximately 1/3 of patients developing CCC present a particularly lethal form of dilated cardiomyopathy, with shorter survival than idiopathic dilated cardiomyopathy [6]. In addition, CCC is associated with a worse prognosis and survival than other cardiomyopathies of non-inflammatory etiology (NIC) [7]. Although currently used trypanocidal drugs are effective in the treatment of acute or recent infection in children their efficacy in halting the progression of cardiac lesions has not been established yet [8]. Data suggest that the mononuclear inflammatory infiltrate, associated with cardiomyocyte destruction and fibrosis observed only in CCC myocardium, plays a major role in the development and progression of the disease [5,9].

Histologically, CCC myocardium displays a diffuse myocarditis with focal aspects; a mononuclear infiltrate, intense heart fiber damage, prominent fibrosis and scarcity of *T. cruzi* parasites (reviewed in [10]). The inflammatory infiltrate of CCC heart lesions is composed mainly by T cells and macrophages [9,11]. Heart-infiltrating T cells and other mononuclear cells predominantly produce TNF- $\alpha$  and IFN- $\gamma$  [12,13,14], and a similar increase in IFN- $\gamma$  and TNF- $\alpha$  is seen in cardiac tissue from animals infected with *T. cruzi* [15,16]. An increased number of IFN- $\gamma$ -producing cells is found in peripheral blood mononuclear cells (PBMC) of CCC patients [14,17]. Together, data suggest a predominance of Th1-type T cells in CCC myocardium and

peripheral blood [18]. However, the factors that determine the migration and accumulation of the Th1-type T cell in CCC heart tissue are still obscure. The possibility that chronic myocardial inflammation and tissue damage in CCC are a consequence of recognition of *T. cruzi* antigen on heart tissue must be entertained. However, *T. cruzi* DNA, a surrogate marker of the presence of living parasites, has been equally detected in hearts of CCC and ASY patients [19,20], indicating that mere parasite presence in the heart is not sufficient for inducing inflammatory tissue damage. Both *T. cruzi*-specific [21] or heart antigen (cardiac-myosin) - specific T cells - crossreactive with *T. cruzi* antigen [22] - have been identified in the myocardial inflammatory infiltrate. Since both cardiac proteins and *T. cruzi* antigen are present in hearts of both CCC and ASY patients, some other factor distinct from antigen availability must control the difference in inflammation and disease progression between Chagas disease patients.

Given the important role of chemokines such as CCL3, CCL4, CCL5 and CXCL9 and CXCL10 in tissue accumulation of CCR5<sup>+</sup> and/or CXCR3<sup>+</sup> Th1-type T cells [23], it is possible that the development and maintenance of the tissue-damaging Th1-rich mononuclear infiltrate in CCC myocardium could be a consequence of the *in situ* expression of chemokine ligands to those receptors. Indeed, increased mRNA levels of CC and CXC chemokines have been detected in the heart tissue of *T. cruzi*-infected mice (reviewed in [24,25]). Additionally, increased numbers of CCR5<sup>+</sup> CXCR3<sup>+</sup> CD4<sup>+</sup> and CD8<sup>+</sup> T cells producing IFN- $\gamma$  and/or TNF- $\alpha$  were found in PBMC from CCC patients, as compared with ASY patients [26]. Previous studies from our group showed that gene expression levels of IFN- $\gamma$ -inducible chemokines CXCL9 and CXCL10 were significantly up-regulated in CCC myocardium [27]. Local production of CXCL9 and CXCL10 by mononuclear infiltrating and stromal cells leads to the recruitment of effector Th1 lymphocytes into inflamed tissues in delayed hypersensitivity reactions (reviewed in [28]). Conversely, functional polymorphisms controlling expression, and loss-of-function deletions in protein-coding regions of genes encoding chemokines and their receptors have been associated with development of several inflammatory and autoimmune diseases [29,30,31]. This indicates that chemokine polymorphisms can control organ-specific inflammatory damage -even in the presence of similar amounts of antigen- by means of regulating inflammatory cell influx. We therefore hypothesized that an imbalance at the Th1-associated chemokine-chemokine receptor axis - perhaps of genetic origin - could play a role in the maintenance of the inflammatory infiltrate in CCC patients.

Here, we analyzed cell surface staining and gene expression of the chemokine receptors CXCR3 and CCR5, associated to the Th1 phenotype, and their ligands. Conversely, we also studied the CCR4 and CCR8 receptors, associated to the Th2 phenotype, and their chemokine ligands, as well as the chemokine receptor CCR7, associated to memory phenotypes, and its ligands in myocardial samples from end-stage CCC and non-inflammatory cardiomyopathy patients, as well as control subjects. In addition, we analyzed single-nucleotide polymorphisms (SNPs) for genes encoding 8 such chemokines and receptors in a cohort of Chagas disease patients stratified according to clinical form (ASY, CCC) and presence of ventricular dysfunction among CCC patients.

## Methods

### Ethics Statement

The protocol was approved by the Institutional Review Board of the University of São Paulo School of Medicine (Protocol number 739/2005 and 0324/2009) and written informed consent

was obtained from the patients. In the case of samples from heart donors, written informed consent was obtained from their families.

### Patients and sample collection

All Chagas disease patients were considered serologically positive for antibodies against *T. cruzi* on the basis of results of at least 2 of 3 independent tests (EIA [Hemobio Chagas; Embrabio São Paulo], indirect immunofluorescence assay [IFA-immunocruzi; Biolab Merieux], and indirect hemagglutination test [Biolab Merieux]). All Chagas disease patients underwent standard electrocardiography and echocardiography. Echocardiography was performed in the hospital setting using an Acuson Sequoia model 512 echocardiographer with a broad-band transducer. The left ventricular dimensions and regional and global function evaluations were performed using a 2-dimension and M-mode approach, in accordance with the recommendations of the American Society of Echocardiography. Patients with CCC presented with abnormal electrocardiography findings that ranged from typical conduction abnormalities (right bundle branch block and/or left anterior division hemiblock) to severe arrhythmia [32]. A group of patients also presented varying degrees of ventricular dysfunction classified on the basis of left ventricular ejection fraction, with all other causes of ventricular dysfunction/heart failure excluded. All asymptomatic (ASY) subjects had normal echocardiograph and echocardiogram findings, chest radiographs with no evidence of cardiac enlargement, and normal findings of radiographs of the esophagus and colon.

Myocardial left ventricular free wall heart samples were obtained from end-stage heart failure CCC patients ( $n=14$ , positive for antibodies against *T. cruzi* and born in endemic areas for Chagas disease, five males and nine females, mean age  $47.2\pm 14.6$  years, Table 1) and end-stage heart failure patients with non-inflammatory cardiomyopathies (NIC,  $n=8$ , five patients with idiopathic dilated cardiomyopathy and three patients with Ischemic cardiomyopathy, all seronegative for *T. cruzi*, eight males, mean age  $53.3\pm 7.5$  years, Table 1). Control adult heart tissue from the left ventricular-free wall was obtained from nonfailing donor hearts (N,  $n=6$ , males, mean age  $32.2\pm 12.8$  years, Table 1) not used for cardiac transplantation due to size mismatch with available recipients. Hearts were explanted at the time of heart transplantation at the Heart Institute - InCor, University of São Paulo School of Medicine, São Paulo, SP, Brazil. For histological studies, fresh tissues were fixed in buffered formalin solution and paraffin-embedded; for immunofluorescence, fresh samples were maintained in a 30% sucrose solution for approximately 30 min at  $4^{\circ}\text{C}$ ; then they were transferred to OCT Tissue Tek freezing medium and immediately frozen in isopentane and stored at  $-80^{\circ}\text{C}$ . For mRNA extraction, samples were quickly dissected, and myocardial tissue was frozen in liquid nitrogen and stored at  $-80^{\circ}\text{C}$ . For SNP genotyping, genomic DNA was obtained from myocardial left ventricular free wall heart samples using the QIAamp DNA Blood Max Kit (Qiagen, Hilden, Germany) and stored at  $-20^{\circ}\text{C}$ .

Blood samples were collected from the patients who were categorized as being ASY ( $n=151$ , 72 males, mean age  $50.8\pm 3.6$  years, and 79 females, mean age  $54.1\pm 3.5$  years) or as having CCC ( $n=174$ , 83 males, mean age  $50.8\pm 0.5$  years, and 91 females, mean age  $48.0\pm 6.6$  years) on the basis of clinical, radiological, electrocardiographic (ECG), echocardiographic criteria and all of patients were serologically positive for antibodies against *T. cruzi* and born in endemic areas for Chagas disease. All of ASY patients had normal ECG findings and a normal left ventricular ejection fraction (LVEF) at the time of echocardiography, as well as normal findings for chest, esophagus and colon

radiography. The CCC patients presented with typical ECG findings (right bundle branch block and/or left anterior division hemiblock and were classified as having moderate ( $\text{LVEF}>40\%$ ,  $n=79$ ) or severe ( $\text{LVEF}\leq 40\%$ ,  $n=95$ ) CCC. Genomic DNA was extracted by the dodecyltrimethyl ammonium bromide/hexadecyltrimethylammonium bromide method and stored at  $-20^{\circ}\text{C}$ .

### Histological and Immunofluorescence staining/Confocal analysis

Individual  $5\text{-}\mu\text{m}$  sections of paraffin-embedded tissue or cryosections of frozen myocardial fragments were applied to microscope slides. Slides were subjected either to hematoxylin-eosin or immunofluorescence staining. Standard hematoxylin-eosin staining was performed for evaluation of the intensity and location of the inflammatory infiltrate. Slides were evaluated and scored for the intensity of myocarditis, fibrosis and hypertrophy. Slides for immunofluorescence were washed in phosphate-buffered saline (PBS) and blocked with PBS-2% bovine serum albumin. Slides were incubated overnight at  $4^{\circ}\text{C}$  with the primary monoclonal antibodies anti-CD3, anti-CD4, anti-CD8, anti-CCR5, anti-CXCR3, anti-CCR4, anti-CCL5 or anti-CXCL9 (R&D Systems, Minneapolis, MN, USA); after washing, slides were incubated with the secondary antibody, anti-mouse IgG conjugated to AlexaFluor 633 (Invitrogen, Carlsbad, CA, EUA) and 4',6'-diamidino-2-phenylindole (DAPI, Sigma-Aldrich, Steinheim, Germany) for nuclear staining. Slides were mounted using antifade mounting medium (Hydromount, National Diagnostics, Atlanta, GA, USA). Fluorescent images were acquired using UV/Laser excitation on an LSM/Meta 510 Zeiss microscope, with an oil immersion objective ( $63\times$ , 1.25 numerical aperture). For each section, the area with most uniform infiltrate was selected for analysis. Within this inflammatory area, minimums of five fields were acquired. Image analysis and processing were performed using LSM Image Examiner software (Carl Zeiss, Standort Göttingen, Germany). Omission of primary antibody and replacement with non-immune mouse IgG was used to confirm the lack of nonspecific staining.

### RNA isolation, reverse transcription and quantitative real-time polymerase chain reaction (real-time qPCR)

Total RNA was extracted from  $5\times 5\times 5$  mm myocardial samples using the Trizol<sup>®</sup> method (Life Technologies Inc., Grand Island, NY). The RNA was quantified using NanoDrop Spectrophotometry (Thermo Scientific), and treated with Rnase-free DNase I (USB, Ohio, USA). cDNA was obtained from 5  $\mu\text{g}$  total RNA using Super-script II<sup>™</sup> Reverse Transcriptase (Invitrogen, Carlsbad, CA, USA). We designed forward and reverse primers for real-time qPCR assays using the Primer Express software (Applied Biosystems, Foster City, CA, USA; Table S1). Real-time qPCR reactions were carried out in an ABI Prism 7500 Sequence Detection system (Applied Biosystems) using the SYBR Green PCR Master Mix (Applied Biosystems), as described [33]. For all genes, we constructed standard curves and determined the slope to calculate the PCR efficiency. All the samples were tested in triplicate with the GAPDH, previously shown to display little variance among human myocardial tissue samples [27], as the reference gene for normalization of data, and relative expression of each mRNA was calculated with the  $2^{-\Delta\Delta\text{Ct}}$  method [34], using expression in six normal donor hearts as calibrator.

### SNP genotyping

We searched for polymorphisms in our target genes preferentially in putatively regulatory regions such as 5' and 3' untranslated

**Table 1.** Characteristics of patients and control donors whose myocardial samples were used in gene expression studies.

| Internal n°         | Age | Sex | Disease group | EF | Fibrosis | LVDD | Hypertrophy | Myocarditis | ANPRelative | BNP expression |
|---------------------|-----|-----|---------------|----|----------|------|-------------|-------------|-------------|----------------|
| CCC patients        |     |     |               |    |          |      |             |             |             |                |
| CCC1                | 15  | M   | CCC           | 17 | 1+       | 62   | Y           | 1+          | 5.0         | 221.5          |
| CCC2                | 44  | F   | CCC           | 21 | 1+       | 70   | Y           | 1+          | 223.6       | 780.6          |
| CCC3                | 61  | F   | CCC           | 15 | 1+       | 76   | Y           | 1+          | 2.2         | 51.2           |
| CCC4                | 23  | F   | CCC           | 39 | 2+       | 78   | Y           | 2+          | 55.8        | 402.6          |
| CCC5                | 50  | M   | CCC           | 11 | 2+       | 82   | Y           | 2+          | 61.0        | 468.8          |
| CCC6                | 49  | F   | CCC           | 37 | 3+       | 77   | Y           | 3+          | 57.1        | 268.6          |
| CCC7                | 49  | F   | CCC           | 15 | 2+       | 83   | Y           | 3+          | 15.0        | 90.8           |
| CCC8                | 28  | M   | CCC           | 21 | 2+       | 68   | Y           | 2+          | 2.6         | 8.1            |
| CCC9                | 54  | F   | CCC           | 36 | 2+       | 62   | Y           | 2+          | 155.3       | 828.2          |
| CCC10               | 58  | M   | CCC           | 29 | 2+       | 64   | Y           | 2+          | 88.2        | 832.6          |
| CCC11               | 57  | M   | CCC           | 29 | 1+       | 71   | Y           | 2+          | 11.8        | 65.0           |
| CCC12               | 60  | F   | CCC           | 20 | 2+       | 72   | Y           | 3+          | 7.4         | 264.6          |
| CCC13               | 61  | F   | CCC           | 27 | 1+       | 77   | Y           | 0           | 157.1       | 1729.1         |
| CCC14               | 50  | F   | CCC           | 23 | 2+       | 61   | Y           | 3+          | 198.5       | 1844.1         |
| NIC patients        |     |     |               |    |          |      |             |             |             |                |
| NIC1                | 53  | M   | IDC           | 19 | 1+       | 77   | Y           | 0           | 53.0        | 160.1          |
| NIC2                | 38  | M   | IDC           | 16 | 1+       | 88   | Y           | 0           | 510.0       | 425.2          |
| NIC3                | 63  | M   | IDC           | 38 | 1+       | ND   | Y           | 0           | 1.2         | 13.6           |
| NIC4                | 55  | M   | IDC           | 25 | 3+       | 51   | Y           | 0           | 4.4         | 29.8           |
| NIC5                | 58  | M   | IDC           | 16 | 2+       | 99   | Y           | 0           | 38.3        | 179.7          |
| NIC6                | 62  | M   | IC            | 37 | 2+       | 75   | Y           | 0           | 4.0         | 28.1           |
| NIC7                | 61  | M   | IC            | 33 | 3+       | 79   | Y           | 0           | 0.1         | 0.2            |
| NIC8                | 52  | M   | IC            | 20 | 3+       | 62   | Y           | 0           | 8.8         | 546.2          |
| Control individuals |     |     |               |    |          |      |             |             |             |                |
| N1                  | 46  | M   | Normal        | ND | 0        | ND   | N           | 0           | -           | -              |
| N2                  | 40  | M   | Normal        | ND | 0        | ND   | N           | 0           | -           | -              |
| N3                  | 22  | M   | Normal        | ND | 0        | ND   | N           | 0           | -           | -              |
| N4                  | 20  | M   | Normal        | ND | 0        | ND   | N           | 0           | -           | -              |
| N5                  | 45  | M   | Normal        | ND | 0        | ND   | N           | 0           | -           | -              |
| N6                  | 20  | M   | Normal        | ND | 0        | ND   | N           | 0           | -           | -              |

Age (years). M (male). F (female). CCC (Chronic Chagasic Cardiomyopathy). NIC (Non-inflammatory Cardiomyopathy). IDC (Idiopathic Dilated Cardiomyopathy). IC (Ischemic Cardiomyopathy). Normal heart donors were subject to ventilator and vasoactive drugs, and had been under life support for an average of 48 hours. Characterization of the samples as myocarditis, fibrosis and hypertrophy; reference values for the presence of myocarditis and fibrosis: 0: absent; 1+: slight; 2+: moderate; 3+: intense; hypertrophy: Y: yes N: no. EF (Ejection Fraction) was always less than 40%. LVDD (left ventricle diastolic diameter) normal reference value: diameter 39–55 mm. Values of mRNA expression (RT-qPCR) of the atrial natriuretic peptide (ANP) and the brain natriuretic peptide (BNP). -, Control samples were used as calibrators in the RT-qPCR reaction and have no relative expression value using the  $2^{-\Delta\Delta Ct}$  calculation method as described in Methods.

doi:10.1371/journal.pntd.0001867.t001

regions (UTR) or intronic regions, and which had previously been studied in disease association studies. This was the case of *CXCL9* rs10336, *CXCL10* rs3921, *CCL5* rs2107538 and *CCR5* rs1799988 [35,36,37]. In the cases of target genes where no previous study was found - *CCL4*, *CCL17*, *CCL19* and *CXCR3* - the selected SNPs (*CCL4* rs1719153, *CCL17* rs223827, *CCL19* rs3136658 and *CXCR3* rs2280964) were located in putatively regulatory sites, with minimum allele frequencies above 0.2 in the CEU (Caucasian) and Yoruba (YRI) populations at the HapMap database (site <http://hapmap.ncbi.nlm.nih.gov>) (Table S2). Genotyping was performed using the designed assay of the TaqMan allelic discrimination technique (ABI 7500, Applied Biosystem, Foster City, USA) and evaluated according to the manufacturer's instructions. The following SNPs were tested: SNP *CCL4*

rs1719153 (part n°. *C\_12120537\_10*), *CCL5* rs2107538 (part n°. *C\_15874407\_10*), *CCR5* rs1799988 (part n°. *C\_11988170\_10*), *CXCL9* rs10336 (part n°. *C\_486222\_10*), *CXCL10* rs3921 (part n°. *C\_497062\_10*), *CXCR3* rs2280964 (part n°. *C\_15874773\_10*), *CCL17* rs223827 (part n°. *C\_2845028\_10*) and *CCL19* rs3136658 (part n°. *C\_25981926\_10*) *CCL4*, *CXCL9* and *CXCL10* are mapped to the 3' untranslated region (UTR); *CCL5* and *CCR5* are mapped to the 5' UTR; *CCL17*, *CCL19* and *CXCR3* are mapped to intronic regions.

### Statistical analysis

Values of the relative expression of each mRNA in the CCC and NIC groups were compared with the Mann-Whitney U test. Correlation analysis was performed by Spearman's nonparametric

correlation test with SPSS version 14.0 software (SPSS, Chicago, Ill). Associations between patient groups and genotypes or a specific allele were analyzed by the  $\chi^2$  statistical test, along with the relevant odds ratio (OR) and 95% confidence interval (CI). Fisher's exact test was used when at least one value in the contingency table was  $<5$ . We considered differences as significant when the p value was less than 0.05 and the CI did not cross 1. Hardy-Weinberg equilibrium (HWE) was determined by comparing the observed number of different genotypes with the expected number under the HWE for the estimated allele frequency.

## Results

### Patient and sample features

While myocardial sections from both CCC and NIC groups displayed cardiomyocyte hypertrophy and fibrosis upon histopathological analysis, lymphocytic myocarditis was only observed among samples from CCC patients (Figure 1A, Table 1). Although all CCC patients presented clinically similar end-stage heart disease, variable degrees of lymphocytic myocarditis were observed. No significant differences were found in age, ejection fraction (EF) or left ventricular diastolic diameter (LVDD) between the two groups, and mRNA expression of the natriuretic peptides ANP and BNP was substantially upregulated in comparison to control myocardium samples (Table 1), indicative of activation of the embryonic/hypertrophic gene expression pattern consistent with advanced heart failure.

### Heart-infiltrating mononuclear express multiple chemokines and chemokine receptors

Using immunofluorescence confocal microscopy, we assessed the surface phenotype of mononuclear cells in the myocardial inflammatory infiltrate of CCC samples (Figure 1B and Figure S1). CD3<sup>+</sup>, CD4<sup>+</sup> and CD8<sup>+</sup> T cells were abundant in CCC myocardium, very scarce in NIC samples and essentially absent in control samples (N), in line with histopathological data (Figure S1). We observed mononuclear cells staining for CXCR3 and CCR5-typical of Th1 T cells - as well as CCR4 - more commonly described as a marker of Th2 T cells in CCC myocardium (Figure 1B). CXCR3 staining was also observed in non-mononuclear, stromal cells in CCC heart tissue (Figure 1B, Figure S1). In addition, we observed in situ expression of the chemokines CCL5 and CXCL9, ligands of the CCR5 and CXCR3 receptors, in mononuclear cells infiltrating the myocardium of CCC patients (Figure 1B). We could also observe CCL5 staining in endothelial cells lining what seems to be a blood vessel in CCC myocardium (Figure 1B, Figure S1). Specificity of the tested antibody staining is shown at Figure 1B.

### Multiple T cell chemoattractant chemokines and their receptors are expressed in heart tissue from CCC patients

We assessed mRNA expression of CCR5 and CXCR3 chemokine receptors associated with inflammatory, Th1-type T cells, as well as the chemokine receptors CCR4 and CCR8, which are associated to a Th2 phenotype, and CCR7, a chemokine receptor associated to memory phenotypes, in myocardium tissue from CCC, NIC and control samples using real-time qPCR. Figure 2A shows that mRNA expression levels of CCR5, CXCR3 and CCR4 were significantly higher in CCC myocardial tissue than that of NIC patients and normal donors, which corroborated with the immunofluorescence detection data (Figure 1B). The expression of CCR8 mRNA did not differ significantly between the CCC and NIC groups (Figure 2A). The expression of CCL1 (CCR8 ligand) was undetectable in CCC, NIC and control samples.

The expression of mRNA encoding CCR5 ligands (CCL3, CCL4 and CCL5), CXCR3 ligands (CXCL9 and CXCL10), the CCR4 ligand CCL17 and the CCR7 ligand CCL19 was significantly higher in CCC than in NIC myocardium (Figure 2B). Of note, median CCL5 expression in CCC myocardium was over 100-fold higher than normal controls. The expression of CXCL9, CXCL10, CCL17 and CCL19 in CCC samples was between 10 and 100-fold higher than normal control samples. Of interest, mRNA levels of CCL21, another CCR7 ligand, were 5-fold higher in samples from both CCC and NIC heart tissue than in samples from control individuals (Figure 2B). As the expression of CCR7 was undetectable in myocardium samples from control individuals, the relative expression of this receptor could not be subjected to relative quantification using the  $\Delta\Delta C_t$  method. We found that the average  $\Delta C_t$  value of CCR7 in heart tissue from the CCC patients was significantly lower than in NIC myocardium ( $14.52 \pm 2.9$  versus  $18.34 \pm 2.5$ ;  $p = 0.01$ , data not shown), indicating that this gene also displayed increased expression in CCC as compared to NIC myocardium.

We also analyzed whether chemokine expression was associated with histopathological parameters in CCC heart tissue. We found a positive correlation between mRNA expression of CXCL9 and the histopathologically assessed intensity of myocarditis (Figure 3). CXCL9 also showed a positive correlation with chemokine receptors CXCR3, CCR4 and CCR5, as well as chemokines CCL5, CXCL10 and CCL17. In addition, positive correlations were also found between CXCR3 and CCR5; the chemokine receptors and several of their ligands; and between several CC and CXC chemokines (Figure S2).

Given the focal nature of the myocarditis and fibrosis in CCC myocardium, we assessed the gene expression profile in different sites of the left ventricular free wall of three patients. This profile was found to be essentially concordant in samples from different sites of the myocardium of the same patients (Table S3). We also found a positive correlation of global gene expression between almost all CCC samples (Figure S3), indicating that most CCC patients share a similar pattern of gene expression, with individual-specific variation in global magnitudes of expression. These global magnitudes of gene expression seem thus to be maintained in distinct regions of the myocardium (Table S3).

### Genotypes of SNPs of CCR5, CXCL9 and CXCL10 are associated with CCC severity

In order to investigate whether the observed variation in global magnitudes of gene expression was due to genetic polymorphisms, we evaluated single nucleotide polymorphisms in the most highly expressed genes in CCC heart tissue (fold expression  $>10$  as compared to normal donor samples). We compared genotypic and allele frequencies in the CCC and ASY groups of a sample of 325 Brazilian chronic Chagas disease patients, and also stratified CCC patients according to their LVEF status, comparing the two CCC groups according to severity of ventricular dysfunction: those patients classified as severe (LVEF  $\leq 40\%$ ) or moderate (LVEF  $>40\%$ ) CCC. All the SNPs were in HWE in both CCC and ASY subjects.

There are no significant differences in genotype and allele frequencies of SNP *CXCL9* rs10336 between CCC and ASY (Table 2). However, the *CXCL9* rs10336 CC genotype was significantly less frequent among the severe CCC than in the moderate CCC group (OR, 0.47 [95% CI, 0.25–0.87] Table 2). Accordingly, the *CXCL9* rs10336 C allele was significantly less frequent among the severe CCC than in the moderate CCC



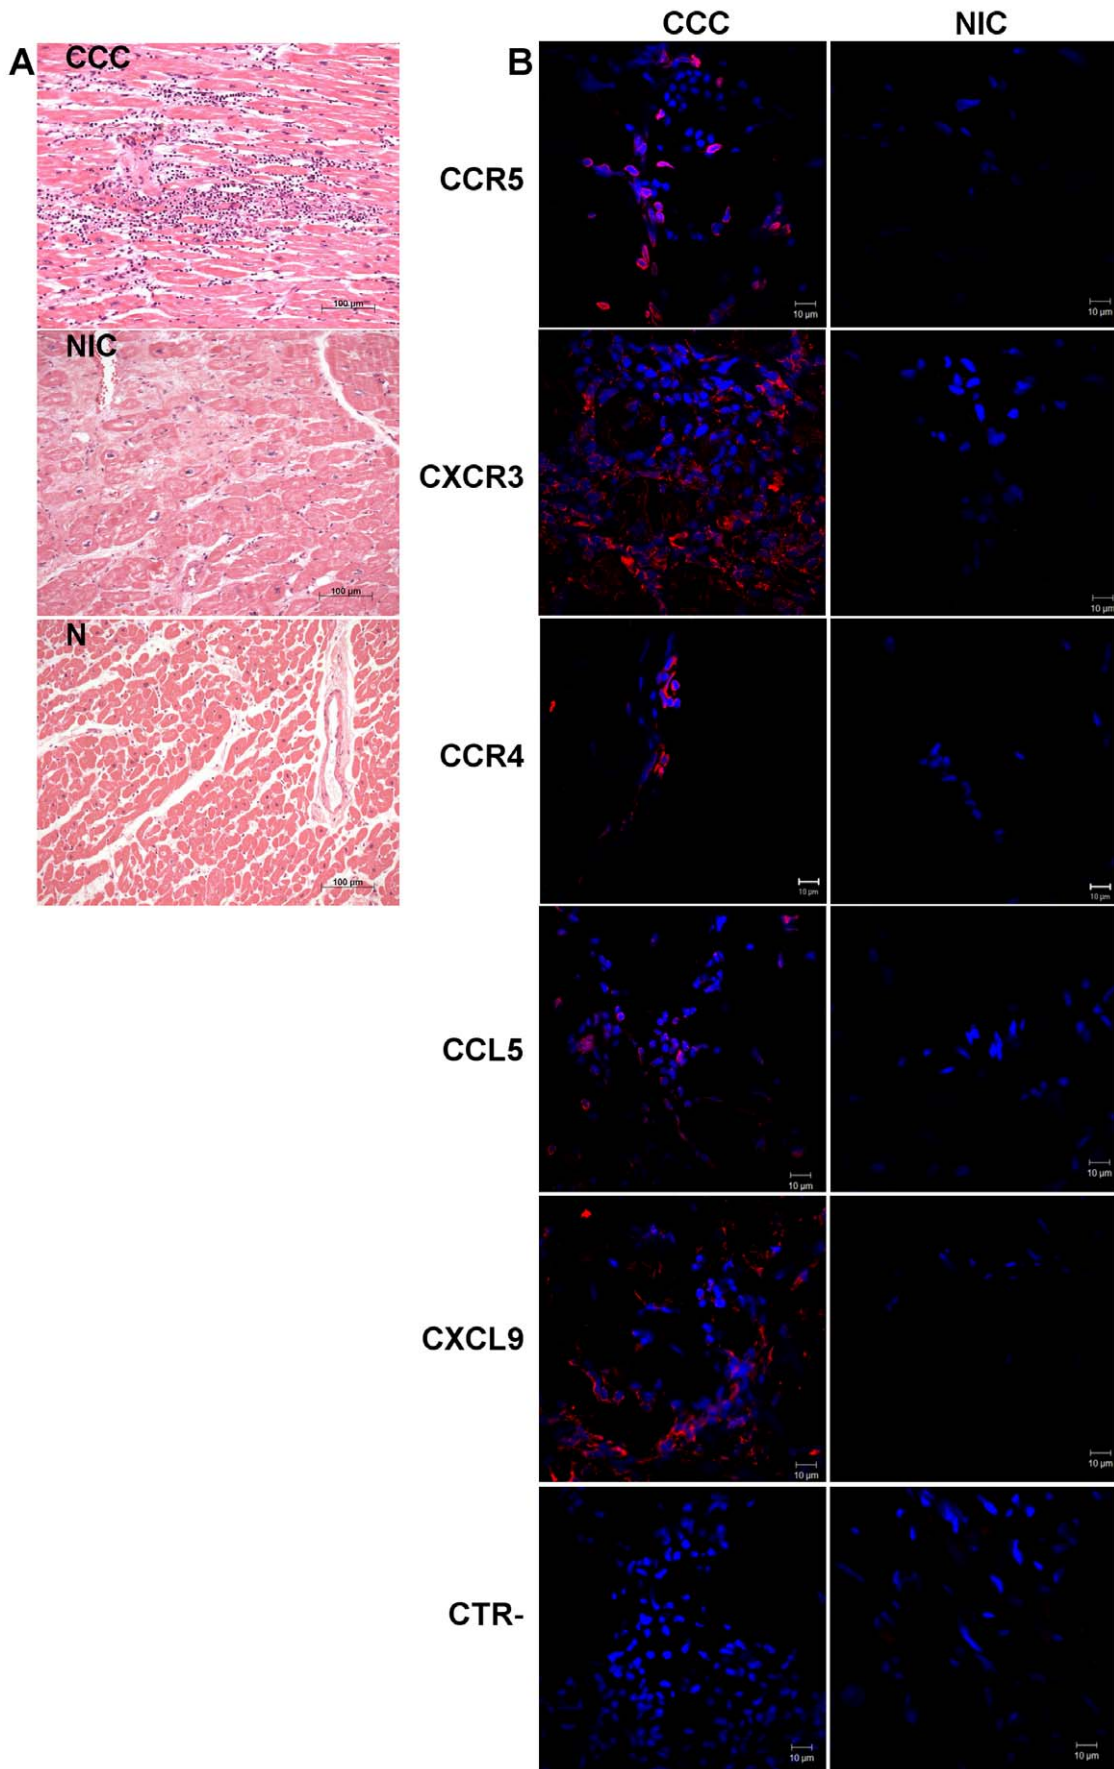

**Figure 1. Histopathological analysis and localization of CCR5<sup>+</sup>, CXCR3<sup>+</sup>, CCR4<sup>+</sup>, CCL5<sup>+</sup> and CXCL9<sup>+</sup> cells in heart tissue.** Severe myocarditis with intense mononuclear inflammatory infiltrate in the heart tissues of CCC patient, and absence of myocarditis in the heart tissues of NIC patients and individuals without cardiomyopathies (N). In (A), images representative of heart fragments from CCC, NIC and N individuals. Haematoxylin-eosin stain. Representative images of immunofluorescence confocal microscopy from heart tissue sections from CCC and NIC (B). Sections were stained with primary antibodies against CCR5, CXCR3, CCR4, CCL5 and CXCL9 stained with AF633-conjugated anti-mouse IgG (red) and counterstained with DAPI (blue), as described in Methods. CTR- IgG isotype controls. doi:10.1371/journal.pntd.0001867.g001

group. Thus, both the *C* allele and the *CC* genotype are associated to a lower risk for severe CCC.

There are no significant differences in *GG* and *CG* frequencies of SNP *CXCL10* rs3921 polymorphism in the patients with CCC when compared with ASY patients (Table 3). However, the *CXCL10* rs3921 *GG* genotype was significantly less frequent among the severe CCC than in the moderate CCC group (OR, 0.41 [95% CI, 0.22–0.79] Table 3). Accordingly, the *CXCL10* rs3921 *G* allele was significantly less frequent among the severe CCC than in the moderate CCC group. Therefore, both the *G* allele and the *GG* genotype apparently are associated to a lower risk for severe CCC. Conversely, the *CXCL10* rs3921 *C* allele was significantly more frequent between the severe CCC than in the moderate CCC group, thus the *CC* genotype is associated to a higher risk for severe CCC.

The genotype and allele frequencies of the *CCR5* rs1799988 *CT* polymorphism are given in Table 4. The genotype and allele distribution of this polymorphism in the CCC patients was not significantly different from that found among ASY patients. The *CCR5* rs1799988 *CC* genotype was significantly more frequent among the severe CCC than in the moderate CCC group (OR, 2.31 [95% CI, 1.14–4.67] Table 4). Accordingly, the *CCR5* rs1799988 *C* allele was significantly more frequent among the severe CCC than in the moderate CCC group. Results indicate that both the *C* allele and the *CC* genotype of *CCR5* rs1799988 are associated to a higher risk for severe CCC.

No differences in genotypic and allelic frequencies were found in the studied SNPs in *CCL4*, *CCL5*, *CXCR3*, *CCL17* and *CCL19* between CCC and ASY patients (Tables S4, S5, S6, S7 and S8).

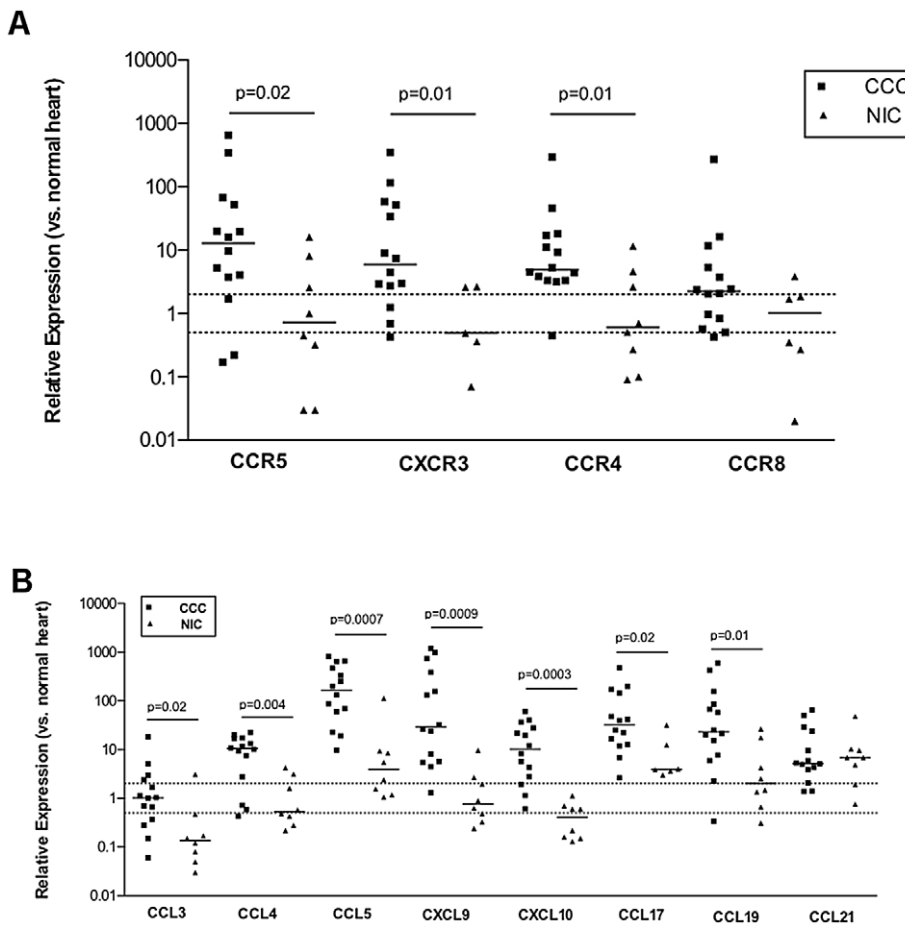

**Figure 2. Expression of chemokines and chemokine receptors in myocardium.** Expression of chemokine receptors (A) in CCC and NIC myocardium. Expression of chemokines (B) in CCC and NIC myocardium. Real-time qPCR analysis of mRNA levels expression in CCC and NIC myocardium. After normalization to GAPDH mRNA, the relative expression was plotted in comparison to N group and data were calculated with the  $2^{-\Delta\Delta Ct}$  method, as described in Methods. The horizontal bar stands for the median. Dotted lines indicate two-fold increase or decrease expression as compared with the control group. doi:10.1371/journal.pntd.0001867.g002

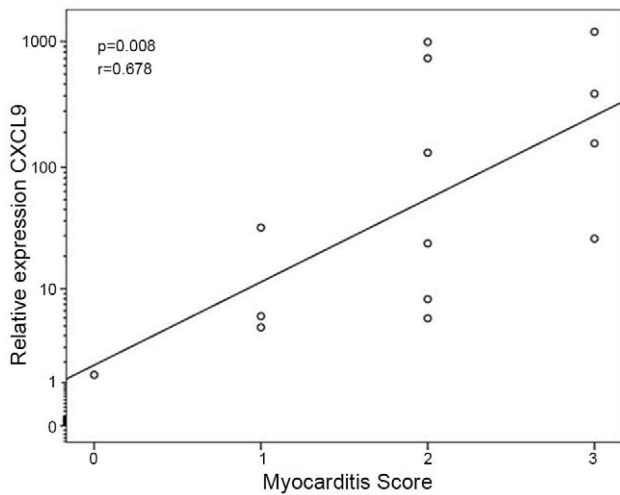

**Figure 3. Correlation between histopathologically assessed intensity of myocarditis and mRNA expression of CXCL9 in CCC myocardium.** Two-tailed p value obtained with Spearman's nonparametric correlation. n = 14. doi:10.1371/journal.pntd.0001867.g003

### Protective CXCL9 and CXCL10 polymorphisms are associated with lower myocardial chemokine expression and myocarditis

We next analyzed whether *CXCL9* and *CXCL10* polymorphisms associated to decreased or increased risk of CCC development conveyed different levels of chemokine/chemokine receptor expression in CCC heart samples. The study could not be done for *CCR5* because there was only one *TT* patient. We found that myocardial expression of *CXCL9* mRNA among samples from patients bearing the protective SNP *CXCL9* rs10336 genotype *CC* (n = 5) was 5-fold lower than that of patients bearing the *TT* or *CT*

genotypes. We also found that *CCL3*, *CCL5*, *CXCL10*, *CXCR3*, *CCL17* and *CCR4* were 2–6-fold less expressed in SNP *CXCL9* rs10336 genotype *CC* as compared with samples from patients bearing the *TT* or *CT* genotypes (Figure 4A).

Likewise, we found that myocardial *CXCL10* expression among samples from patients bearing the protective SNP *CXCL10* rs3921 genotype *GG* (n = 4) was 3-fold less intense than that of patients bearing the *CC* or *CG* genotypes. We also found that *CCL3*, *CXCL9* and *CCR4* were 2–3 fold less expressed in samples from patients carrying SNP *CXCL10* rs3921 genotype *GG* as compared with those from patients bearing the *CC* or *CG* (Figure 4B).

## Discussion

Although the pathogenic role of myocarditis in CCC is well established, the factors that lead to the maintenance of the myocardial infiltrate have remained unclear. In this paper, we report that mononuclear cells expressing CD3, CD4, CD8, CCR5, CXCR3, CCR4, CXCL9 and CCL5 are found in CCC myocardial tissue. We also found increased mRNA expression of CXCL9, CCL5, the above mentioned chemokine receptors and several of their other chemokine ligands. CXCL9 expression correlated with the intensity of the myocardial infiltrate, as well as with the mRNA expression of CXCR3, CCR5, CCR4, CCR7 and several of their ligands. The closely linked *CXCL9* rs10336 *CC* and *CXCL10* rs3921 *GG* genotypes were associated with protection from severe CCC, while *CCR5* rs179988 *CC* is associated with increased risk for development of severe CCC. Myocardium samples carrying the protective *CXCL9* rs10336 *CC* genotype expressed significantly less mRNA encoding CXCL9 itself, along with *CCL3*, *CCL5*, *CXCL10*, *CXCR3*, *CCL17* and *CCR4*, than samples carrying other *CXCL9* rs10336 genotypes. Similarly, samples carrying the protective *CXCL10* rs3921 *GG* genotype expressed less mRNA encoding *CCL3*, *CXCL9*, *CXCL10* and *CCR4* than samples carrying other *CXCL10* rs3921 genotypes. These results suggest that CXCL9 (and possibly CXCL10) may

**Table 2. Genotype and allele frequencies for the *CXCL9* rs10336 polymorphism in patients with Chagas disease.**

|                                  | CCC              |                      |                    |                  | $\chi^2$ | p      | OR(95%CI)        |
|----------------------------------|------------------|----------------------|--------------------|------------------|----------|--------|------------------|
|                                  | ASY<br>(n = 146) | Moderate<br>(n = 79) | Severe<br>(n = 95) | All<br>(n = 174) |          |        |                  |
| <b>Genotype</b>                  |                  |                      |                    |                  |          |        |                  |
| TT                               | 13(9)            | 4(5)                 | 10(10)             | 14(8)            |          |        |                  |
| TC                               | 71(49)           | 36(46)               | 55(58)             | 91(52)           |          |        |                  |
| CC                               | 62(42)           | 39(49)               | 30(32)             | 69(40)           |          |        |                  |
| <b>Genotype comparison</b>       |                  |                      |                    |                  |          |        |                  |
| TT plus TC vs. CC                |                  |                      |                    |                  |          |        |                  |
| ASY vs. CCC                      |                  |                      |                    |                  | 0.25     | 0.61   | 0.89 (0.56–1.39) |
| LVEF>40% vs. LVEF≤40%            |                  |                      |                    |                  | 5.70     | 0.01*  | 0.47(0.25–0.87)  |
| <b>Allele</b>                    |                  |                      |                    |                  |          |        |                  |
| T                                | 97(33)           | 44(28)               | 75(39)             | 119(34)          |          |        |                  |
| C                                | 195(67)          | 114(72)              | 115(61)            | 229(66)          |          |        |                  |
| <b>Allele comparison T vs. C</b> |                  |                      |                    |                  |          |        |                  |
| ASY vs. CCC                      |                  |                      |                    |                  | 0.06     | 0.79   | 0.95(0.68–1.33)  |
| LVEF>40% vs. LVEF≤40%            |                  |                      |                    |                  | 5.81     | 0.002* | 0.59(0.37–0.93)  |

CCC patients were further stratified by left ventricular ejection fraction values.

Data are no. (%) of patients. Moderate CCC has LVEF>40%. Severe CCC has LVEF≤40%. CI, confidence interval. OR, odds ratio.

doi:10.1371/journal.pntd.0001867.t002



**Table 3.** Genotype and allele frequencies for the *CXCL10* rs3921 polymorphism in patients with Chagas disease.

|                               | CCC              |                      |                    |                  | $\chi^2$ | p      | OR(95% CI)       |
|-------------------------------|------------------|----------------------|--------------------|------------------|----------|--------|------------------|
|                               | ASY<br>(n = 149) | Moderate<br>(n = 77) | Severe<br>(n = 93) | All<br>(n = 170) |          |        |                  |
| <b><i>CXCL10</i> (rs3921)</b> |                  |                      |                    |                  |          |        |                  |
| Genotype                      |                  |                      |                    |                  |          |        |                  |
| CC                            | 15(10)           | 4(5)                 | 14(15)             | 18(11)           |          |        |                  |
| CG                            | 75(50)           | 35(45)               | 52(56)             | 87(51)           |          |        |                  |
| GG                            | 59(40)           | 38(50)               | 27(29)             | 65(38)           |          |        |                  |
| Genotype comparison           |                  |                      |                    |                  |          |        |                  |
| CC plus CG vs. GG             |                  |                      |                    |                  |          |        |                  |
| ASY vs. CCC                   |                  |                      |                    |                  | 0.06     | 0.80   | 0.94 (0.60–1.48) |
| LVEF>40% vs. LVEF≤40%         |                  |                      |                    |                  | 7.36     | 0.006* | 0.41(0.22–0.79)  |
| GG plus CG vs. CC             |                  |                      |                    |                  |          |        |                  |
| ASY vs. CCC                   |                  |                      |                    |                  | 0.02     | 0.87   | 1.05 (0.51–2.18) |
| LVEF>40% vs. LVEF≤40%         |                  |                      |                    |                  | #        | 0.04*  | 3.23(1.01–10.28) |
| Allele                        |                  |                      |                    |                  |          |        |                  |
| C                             | 105(35)          | 43(28)               | 80(43)             | 123(36)          |          |        |                  |
| G                             | 193(65)          | 111(72)              | 106(57)            | 217(64)          |          |        |                  |
| Allele comparison C vs. G     |                  |                      |                    |                  |          |        |                  |
| ASY vs. CCC                   |                  |                      |                    |                  | 0.06     | 0.80   | 0.95(0.69–1.32)  |
| LVEF>40% vs. LVEF≤40%         |                  |                      |                    |                  | 8.30     | 0.003* | 0.51(0.32–0.81)  |

CCC patients were further stratified by left ventricular ejection fraction values.

Data are no. (%) of patients. Moderate CCC has LVEF>40%. Severe CCC has LVEF≤40%. CI, confidence interval. OR, odds ratio.

doi:10.1371/journal.pntd.0001867.t003

**Table 4.** Genotype and allele frequencies for the *CCR5* rs1799988 polymorphism in patients with Chagas disease.

|                                | CCC              |                      |                    |                  | $\chi^2$ | p     | OR(95%CI)        |
|--------------------------------|------------------|----------------------|--------------------|------------------|----------|-------|------------------|
|                                | ASY<br>(n = 150) | Moderate<br>(n = 78) | Severe<br>(n = 93) | All<br>(n = 171) |          |       |                  |
| <b><i>CCR5</i> (rs1799988)</b> |                  |                      |                    |                  |          |       |                  |
| Genotype                       |                  |                      |                    |                  |          |       |                  |
| CC                             | 45(30)           | 15(19)               | 33(35)             | 48(28)           |          |       |                  |
| CT                             | 63(42)           | 43(55)               | 46(49)             | 89(52)           |          |       |                  |
| TT                             | 42(28)           | 20(26)               | 14(15)             | 34(20)           |          |       |                  |
| Genotype comparison            |                  |                      |                    |                  |          |       |                  |
| CC plus CT vs. TT              |                  |                      |                    |                  |          |       |                  |
| ASY vs. CCC                    |                  |                      |                    |                  | 2.91     | 0.08  | 0.63(0.38–1.07)  |
| LVEF>40% vs. LVEF≤40%          |                  |                      |                    |                  | 2.98     | 0.08  | 0.51(0.23–1.10)  |
| TT plus CT vs. CC              |                  |                      |                    |                  |          |       |                  |
| ASY vs. CCC                    |                  |                      |                    |                  | 0.14     | 0.70  | 0.91 (0.56–1.47) |
| LVEF>40% vs. LVEF≤40%          |                  |                      |                    |                  | 5.55     | 0.01* | 2.31(1.14–4.67)  |
| Allele                         |                  |                      |                    |                  |          |       |                  |
| C                              | 153(51)          | 73(47)               | 112(60)            | 185(54)          |          |       |                  |
| T                              | 147(49)          | 83(53)               | 74(40)             | 157(46)          |          |       |                  |
| Allele comparison C vs. T      |                  |                      |                    |                  |          |       |                  |
| ASY vs. CCC                    |                  |                      |                    |                  | 0.61     | 0.61  | 0.88(0.64–1.20)  |
| LVEF>40% vs. LVEF≤40%          |                  |                      |                    |                  | 6.15     | 0.01* | 0.58(0.37–0.89)  |

CCC patients were further stratified by left ventricular ejection fraction values.

Data are no. (%) of patients. Moderate CCC has LVEF>40%. Severe CCC has LVEF≤40%. CI, confidence interval. OR, odds ratio.

doi:10.1371/journal.pntd.0001867.t004

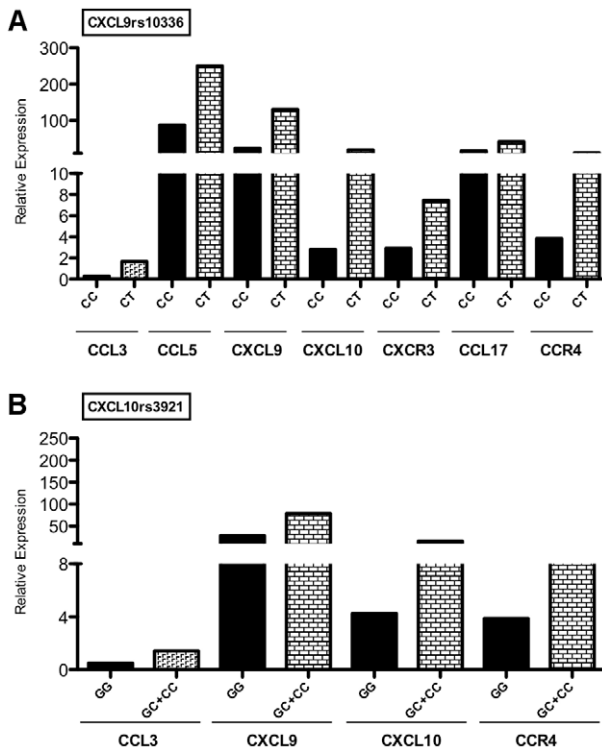

**Figure 4. Chemokine and chemokine receptor expression in myocardium from patients bearing the *CXCL9* and *CXCL10* SNPs.** Expression of chemokines and chemokine receptors in myocardium samples from patients bearing the *CXCL9* rs10336 SNP (A). Expression of chemokines and chemokine receptors in myocardium samples from patients bearing *CXCL10* rs3921 SNP (B). Real-time qPCR analysis of mRNA levels expression in myocardium samples from patients bearing the *CXCL9* rs10336 CC (n=5) or CT (n=9) genotypes (A) and *CXCL10* rs3921 GG (n=5) or CC or CG (n=9). The bar stands for the median. doi:10.1371/journal.pntd.0001867.g004

play an important role modulating the CXCR3/CCR5 chemokine axis and the intensity of mononuclear cell migration to CCC myocardium.

The identification of CCR5<sup>+</sup> and CXCR3<sup>+</sup> mononuclear cells, corroborated by the increased mRNA expression of the same chemokine receptors (Figure 1 and 2) in CCC myocardium, is in line with the prominent finding of mononuclear cells secreting IFN- $\gamma$  and TNF- $\alpha$  in CCC heart tissue [13,14,38], and together are consistent with the influx of Th1 cells expressing these receptors. CCR5 is known to be expressed by macrophages, T and B cells, while CXCR3 is expressed by T and B cells; such cells may thus have been attracted by the respective chemokine ligands [39]. Indeed, CCC patients display increased numbers of CD4<sup>+</sup> and CD8<sup>+</sup> T cells coexpressing CXCR3/CCR5 and IFN- $\gamma$ /TNF- $\alpha$  in peripheral blood when compared to *T. cruzi*-seropositive ASY/IND individuals [26]. In addition, CXCR3 expression was also observed in stromal cells from CCC myocardium (Figure 1B), in line with reports of CXCR3 expression in non-lymphoid cells [40], which may have contributed to the increased CXCR3 mRNA expression in CCC heart tissue. The high expression of CCR4 and CCL17 (Figure 2) is consistent with the presence of Th2 T cells [41]. However, it is unlikely that such cells are functional Th2 T cells, since preliminary observations indicate that IL-4, IL-5, and IL-13 are not expressed in CCC heart tissue (unpublished results). It is possible that other cell types, such as endothelial cells or regulatory T cells, may be responsible for CCR4 and CCL17 expression in CCC myocardium [42,43]. The finding that CCR7

and its ligands CCL19 and CCL21 were upregulated in CCC myocardium is consistent with a role in the recruitment of CCR7<sup>+</sup> cells from the periphery (Figure 2B). CCR7 can be expressed by naïve or central memory T cells, along with endothelial cells, fibroblasts and B cells [44]. Endothelial expression of CCR7 ligands is a known chemoattractant for CCR7<sup>+</sup> central memory and even naïve T cells for migration into inflamed tissue [44]. CCL21, whose mRNA expression is upregulated in myocardium samples of both CCC and NIC patients, is also a chemoattractant for CCR7<sup>+</sup> fibrocytes [45], inducing expression of type I collagen in vitro [46] and thus promotes fibrosis. CCL21 expression may thus be one of the stimuli driving myocardial fibrosis and pathological remodeling both in CCC and NIC.

The identification of CCL5<sup>+</sup> and CXCL9<sup>+</sup> mononuclear cells (Figure 1B), as well as the mRNA expression of these and other CCR5 and CXCR3-binding chemokines (Figure 2B) is in line with the observed accumulation of CCR5<sup>+</sup> and CXCR3<sup>+</sup> mononuclear cells in CCC myocardium. CXCR3 and CCR5-binding chemokines have been postulated to play a role in recruiting polarized Th1 T cells to sites of chronic inflammation [41], and most of them are also IFN- $\gamma$ -inducible chemokines [47]. Interestingly, discrete staining for CCL5 was also observed in structures consistent with microvascular endothelium (Figure 1B), suggesting a role for this chemokine, and possibly other CCR5 ligands, in the migration and accumulation of Th1 cells in CCC heart tissue. CCL3, CCL4, CCL5, CXCL9 and CXCL10 are produced by stimulated T lymphocytes, monocytes/macrophages, as well as fibroblasts, endothelial cells and cardiomyocytes [39,48,49,50] and the myocardial tissue of *T. cruzi*-infected mice [51,52]. Indeed, treatment of *T. cruzi*-infected mice with Met-Rantes, a CCL5-based CCR5 antagonist, reduced the intensity of the inflammatory heart infiltrate, with little effect on parasitism [52], suggesting that CCL5-induced migration of CCR5 inflammatory cells may play a direct role in the genesis of acute *T. cruzi*-induced myocarditis. A recent study has shown that Beagle dogs presenting the cardiac form of *T. cruzi* infection presented higher myocardial mRNA expression of CXCL9 and CCL5 than uninfected animals, during the acute and chronic phases, respectively [53]. Moreover, microarray analysis have identified genes related to inflammation, such as chemokines, to be upregulated in myocardium of mice chronically infected with the Colombian strain of *T. cruzi* and in primary murine cardiomyocytes infected with *T. cruzi* [54,55].

The fact that *CXCL9* mRNA expression was the only chemokine found to display significant correlation with the intensity of the myocardial infiltrate suggests CXCL9 plays a role in mononuclear cell migration to CCC myocardium. The correlation between CXCL9 expression and that of other chemokines, as well as their CXCR3/CCR5/CCR4/CCR7 receptors (Figure 3 and Supplemental data) may be partially related to the finding that CXCL9 has immunomodulatory properties, being able to directly increase expression of CCL2, CCL3 and CCL4 among other inflammatory genes such as TNF- $\alpha$  [56]. Expression of all three chemokines has been shown to be upregulated in CCC myocardial tissue [27], suggesting that CXCL9 may multiply its T-cell chemoattractant properties with the aid of CCR5 ligands in CCC heart tissue. It can thus be hypothesized that IFN- $\gamma$  secreting type 1 T cells in CCC myocardium induce local production of CXCL9 (and perhaps CXCL10), which in turn further recruits IFN- $\gamma$ -secreting CXCR3<sup>+</sup>/CCR5<sup>+</sup> type 1 T cells and other inflammatory cells directly and indirectly, perpetuating the influx of pathogenic Th1-type T cells and inflammation.

The polymorphisms *CXCL9* rs10336 CC and *CXCL10* rs3921 GG, associated with protection from progression to severe CCC,

are located in the 3'UTR region, and the polymorphism *CCR5* rs1799988 *CC*, associated with increased risk for development of severe CCC, is located at the 5'UTR region, where they may influence binding of gene expression control regions to regulatory elements. The findings are in line with previous associations of chemokine or chemokine receptor polymorphisms in CCC (*CCL2* [57], *CCL5* [58], *CCR5* [29,58]). However, to our knowledge, is the first study to find gene polymorphisms associated to the transition to CCC with ventricular dysfunction, which is the most clinically relevant presentation of disease, the one associated with significant morbidity and mortality. Previous gene polymorphism association studies performed in Chagas disease only disclosed polymorphisms relevant for the transition between the ASY and the CCC forms, irrespective of clinical severity (reviewed in [10,59,60,61]). Associations among polymorphic variants in the *CCR5*, *CXCL9* and *CXCL10* genes and disease phenotypes have previously been reported. A sequence variant in the promoter region of the *CCR5* gene, which is associated to reduced expression of *CCR5*, is associated with protection to AIDS progression [62] and is also present at a higher frequency in ASY compared with CCC patients [29]. Although Bruck et al [35] failed to observe any association between the *CXCL9* rs10336 *CT* polymorphism and type 1 diabetes, the *CXCL9* rs2276886 *GA* polymorphic variant was associated with a reduced risk for pediatric Crohn's disease; significantly, *CXCL9* was found to be overexpressed in Crohn's disease gut tissue [63]. The *CXCL10* -201 *G/A* polymorphism is associated with increased susceptibility to chronic hepatitis B disease progression in males. The *CXCL10* -201 *G/A* is a functional polymorphism, where allelic variants modulate *CXCL10* expression by differential interaction with *CXCL10* transcription factors [64]. Still another *CXCL10* polymorphic variant, *CXCL10* rs8878 *TT*, was found to reduce the risk of type 1 diabetes [65].

Since all our CCC myocardium samples came from clinically similar end-stage patients submitted to transplantation, it could be argued that possessing *CXCL9* and/or *CXCL10* genotypes associated to reduced myocardial chemokine expression, or even displaying a less significant inflammatory infiltrate by itself – may not be relevant for the progression of CCC. However, CCC is not a monogenic disease, and it is likely that the progression to overt inflammatory dilated cardiomyopathy may result from the combined effect and inadequate counterregulation of relevant genes. Polymorphisms in multiple innate immunity/inflammatory genes, like *IL1 $\beta$* , *TNF- $\alpha$* , *IL10*, *IL12*, *lymphotoxin- $\alpha$* , *BAT1*, *NFKB1L1*, *MAL/TIRAP*, *MIF* have been found to associate with risk for developing CCC (reviewed in [10,59]). In addition to interference by other genes, differential myocardial resilience, including responses to hypertrophic/fibrogenic factors occurring in CCC heart tissue (*IL1 $\beta$* , *TNF- $\alpha$* , *IFN- $\gamma$* , *IL18*, *CCL21*), could explain why these patients carrying the *CXCL9/CXCL10* protective genotypes progressed to end-stage cardiomyopathy. In the Syrian hamster model of chronic Chagas disease cardiomyopathy, although the intensity of chronic inflammation correlated with ventricular dilation, intensity of myocarditis was similar in hamsters dying from chronic *T. cruzi*-induced dilated cardiomyopathy and survivors euthanized 11 months post-infection [10], suggesting the existence of additional factors related to death from CCC.

The finding that the protective *CXCL9* rs10336 *CC* and *CXCL10* rs3921 *GG* genotypes were associated with lower myocardial expression of the respective chemokines indicate either that the polymorphisms are functional themselves or closely linked to functional polymorphisms. These polymor-

phisms are strongly linked in the caucasian and negroid populations in the HapMap and test populations (data not shown). Indeed, the *CXCL9* and *CXCL10* genes are contained in a CXC chemokine “mini-cluster” at chromosome position 4q21.2 [61,66] and positioned less than 20 Kb apart. The proximity and linkage of the loci renders it difficult to ascertain which of the two genes is actually responsible for the immunological effect. In fact, we found over 60 additional SNPs tightly linked to *CXCL9* rs10336 and *CXCL10* rs3921 in the reference HapMap/CEPH CEU (Northern European Caucasian) and YRI (Yoruba, African) populations in the vicinity of the *CXCL9-CXCL10-CXCL11* chemokine miniclust at Chromosome 4. Some of them are at the 3' UTR or 5'UTR regions of either *CXCL9* or *CXCL10*, with possible transcriptional regulatory activity, and could, in theory, be responsible for the observed functional association (Table S9). The fact that samples carrying genotypes associated to lower risk also displayed reduced expression of several other chemokines and receptors, as well as with reduced intensity of the myocardial infiltrate, may suggest that the *CXCL9* and *CXCL10* genotypes control the intensity of myocarditis through modulation of *CXCL9* and/or *CXCL10* production and its ensuing effects on chemokine ligands of the *CXCR3/CCR5/CCR4* receptors. Together with the finding of a correlation between expression of *CXCL9* and intensity of myocarditis, these results suggest that *CXCL9* may be a master regulator of chemokine-driven inflammatory cell migration to CCC heart tissue. Since the intensity of the infiltrate seems to be a major pathogenic factor, inflammatory cell recruitment into the myocardium driven by *CXCL9* and other CC and CXC chemokines may play an important role in the clinical progression to severe, life-threatening CCC. Several chemokine receptor antagonists are either on late clinical trials or have been licensed [67,68]. *CCR5* and *CXCR3* blockers have been shown to suppress migration of inflammatory cells in acute allograft rejection [69]. Treatment with Met-Rantes ameliorated acute Chagas disease myocarditis in murine models [52]. Together with these reports, our results suggest that the *CCR5/CXCR3* receptors may be therapeutic targets in CCC, where receptor antagonists could dampen inflammatory T cell migration to myocardium, thus controlling CCC myocarditis and, possibly, ventricular dysfunction and death.

## Supporting Information

**Figure S1 Presence of CD3<sup>+</sup>, CD4<sup>+</sup>, CD8<sup>+</sup>, CCR5<sup>+</sup>, CXCR3<sup>+</sup>, CCR4<sup>+</sup>, CCL5<sup>+</sup> and CXCL9<sup>+</sup> cells in heart tissue.** Sections were stained with primary antibodies against CD3, CD4, CD8, CCR5, CXCR3, CCR4, CCL5 and CXCL9 stained with AF633-labeled (red) and counterstained with DAPI (blue) as described in Methods. (TIF)

**Figure S2 Correlations between the levels of expression of different genes in CCC samples.** Two-tailed nonparametric correlation of Spearman. \*\* p<0.01 and \* p<0.05. (TIF)

**Figure S3 Correlation between expression profiles of the 32 studied genes among different CCC myocardial samples.** Two-tailed nonparametric correlation of Spearman. \*\* p<0.01 and \* p<0.05. (TIF)

**Table S1 Characteristics of the primers used in gene expression analysis.** (DOC)

**Table S2 Characteristics and Minimal Allele Frequency of tested SNPs.**

(DOC)

**Table S3 Relative expression values of 14 genes analyzed in different sites of left ventricular free wall samples from three CCC patients, CCC-7, CCC-9 and CCC-10.**

(DOC)

**Table S4 Genotype and allele frequencies for the *CCL4 rs1719153* polymorphism in patients with Chagas disease.** CCC patients were further stratified by left ventricular ejection fraction values.

(DOC)

**Table S5 Genotype and allele frequencies for the *CCL5 rs2107538* polymorphism in patients with Chagas disease.** CCC patients were further stratified by left ventricular ejection fraction values.

(DOC)

**Table S6 Genotype and allele frequencies for the *CXCR3 rs2280964* polymorphism in patients with Chagas disease.** CCC patients were further stratified by left ventricular ejection fraction values.

(DOC)

**Table S7 Genotype and allele frequencies for the *CCL19 rs3136658* polymorphism in patients with Chagas****disease.** CCC patients were further stratified by left ventricular ejection fraction values.

(DOC)

**Table S8 Genotype and allele frequencies for the *CCL17 rs223827* polymorphism in patients with Chagas disease.** CCC patients were further stratified by left ventricular ejection fraction values.

(DOC)

**Table S9 SNPs in tight linkage disequilibrium with *CXCL9 rs10336* and *CXCL10 rs3921*.**

(DOC)

**Acknowledgments**

We thank Dr. Priscila Teixeira for helping in heart tissue collection, Sthefanny Alves for helping in DNA collection, Dr. Ana Lucia Garipo for providing technical assistance with confocal microscopy, Dr. Maria Lucia Carnevale Marin and Dr. Lea Campos de Oliveira for helping in SNP analysis.

**Author Contributions**

Conceived and designed the experiments: LGN JK ECN. Performed the experiments: LGN ECM. Analyzed the data: LGN LAB A. Frade ECN. Contributed reagents/materials/analysis tools: RHBS AIF A. Fragata MS ED CM BMI EAB NAS MHH BS HLW FD PB. Wrote the paper: LGN ECN.

**References**

- Schofield CJ, Jannin J, Salvatella R (2006) The future of Chagas disease control. *Trends Parasitol* 22: 583–588.
- Kirchhoff LV, Weiss LM, Wittner M, Tanowitz HB (2004) Parasitic diseases of the heart. *Front Biosci* 9: 706–723.
- Martin UO, Afchain D, de Marteleur A, Ledesma O, Capron A (1987) [Circulating immune complexes in different developmental stages of Chagas' disease]. *Medicina (B Aires)* 47: 159–162.
- Coura JR (2007) Chagas disease: what is known and what is needed—a background article. *Mem Inst Oswaldo Cruz* 102 Suppl 1: 113–122.
- Higuchi ML, De Moraes CF, Pereira Barreto AC, Lopes EA, Stolf N, et al. (1987) The role of active myocarditis in the development of heart failure in chronic Chagas' disease: a study based on endomyocardial biopsies. *Clin Cardiol* 10: 665–670.
- Barbosa AP, Cardinalli Neto A, Otaviano AP, Rocha BF, Bestetti RB (2011) Comparison of outcome between Chagas cardiomyopathy and idiopathic dilated cardiomyopathy. *Arq Bras Cardiol* 97: 517–525.
- Bestetti RB, Muccillo G (1997) Clinical course of Chagas' heart disease: a comparison with dilated cardiomyopathy. *Int J Cardiol* 60: 187–193.
- Marin-Neto JA, Rassi A Jr, Morillo CA, Avezum A, Connolly SJ, et al. (2008) Rationale and design of a randomized placebo-controlled trial assessing the effects of etiologic treatment in Chagas' cardiomyopathy: the BENznidazole Evaluation For Interrupting Trypanosomiasis (BENEFIT). *Am Heart J* 156: 37–43.
- Milei J, Storino R, Fernandez Alonso G, Beigelman R, Vanzulli S, et al. (1992) Endomyocardial biopsies in chronic chagasic cardiomyopathy. Immunohistochemical and ultrastructural findings. *Cardiology* 80: 424–437.
- Cunha-Neto E, Nogueira LG, Teixeira PC, Ramasawmy R, Drigo SA, et al. (2009) Immunological and non-immunological effects of cytokines and chemokines in the pathogenesis of chronic Chagas disease cardiomyopathy. *Mem Inst Oswaldo Cruz* 104 Suppl 1: 252–258.
- Higuchi Mde L, Gutierrez PS, Aiello VD, Palomino S, Bocchi E, et al. (1993) Immunohistochemical characterization of infiltrating cells in human chronic chagasic myocarditis: comparison with myocardial rejection process. *Virchows Arch A Pathol Anat Histopathol* 423: 157–160.
- Reis DD, Jones EM, Tostes S Jr, Lopes ER, Gazzinelli G, et al. (1993) Characterization of inflammatory infiltrates in chronic chagasic myocardial lesions: presence of tumor necrosis factor- $\alpha$ + cells and dominance of granzyme A+, CD8+ lymphocytes. *Am J Trop Med Hyg* 48: 637–644.
- Reis MM, Higuchi Mde L, Benvenuti LA, Aiello VD, Gutierrez PS, et al. (1997) An in situ quantitative immunohistochemical study of cytokines and IL-2R+ in chronic human chagasic myocarditis: correlation with the presence of myocardial Trypanosoma cruzi antigens. *Clin Immunol Immunopathol* 83: 165–172.
- Abel LC, Rizzo LV, Ianni B, Albuquerque F, Bacal F, et al. (2001) Chronic Chagas' disease cardiomyopathy patients display an increased IFN- $\gamma$  response to Trypanosoma cruzi infection. *J Autoimmun* 17: 99–107.
- Morato MJ, Colley DG, Powell MR (1998) Cytokine profiles during experimental Chagas' disease. *Braz J Med Biol Res* 31: 123–125.
- Talvani A, Ribeiro CS, Aliberti JC, Michailowsky V, Santos PV, et al. (2000) Kinetics of cytokine gene expression in experimental chagasic cardiomyopathy: tissue parasitism and endogenous IFN- $\gamma$  as important determinants of chemokine mRNA expression during infection with Trypanosoma cruzi. *Microbes Infect* 2: 851–866.
- Gomes JA, Bahia-Oliveira LM, Rocha MO, Martins-Filho OA, Gazzinelli G, et al. (2003) Evidence that development of severe cardiomyopathy in human Chagas' disease is due to a Th1-specific immune response. *Infect Immun* 71: 1185–1193.
- Cunha-Neto E, Kalil J (2001) Heart-infiltrating and peripheral T cells in the pathogenesis of human Chagas' disease cardiomyopathy. *Autoimmunity* 34: 187–192.
- Anez N, Carrasco H, Parada H, Crisante G, Rojas A, et al. (1999) Myocardial parasite persistence in chronic chagasic patients. *Am J Trop Med Hyg* 60: 726–732.
- Olivares-Villagomez D, McCurley TL, Vnencak-Jones CL, Correa-Oliveira R, Colley DG, et al. (1998) Polymerase chain reaction amplification of three different Trypanosoma cruzi DNA sequences from human chagasic cardiac tissue. *Am J Trop Med Hyg* 59: 563–570.
- Fonseca SG, Moins-Teisserenc H, Clave E, Ianni B, Nunes VL, et al. (2005) Identification of multiple HLA-A\*0201-restricted cruzipain and FL-160 CD8+ epitopes recognized by T cells from chronically Trypanosoma cruzi-infected patients. *Microbes Infect* 7: 688–697.
- Cunha-Neto E, Coelho V, Guilherme L, Fiorelli A, Stolf N, et al. (1996) Autoimmunity in Chagas' disease. Identification of cardiac myosin-B13 Trypanosoma cruzi protein crossreactive T cell clones in heart lesions of a chronic Chagas' cardiomyopathy patient. *J Clin Invest* 98: 1709–1712.
- Turner JE, Steinmetz OM, Stahl RA, Panzer U (2007) Targeting of Th1-associated chemokine receptors CXCR3 and CCR5 as therapeutic strategy for inflammatory diseases. *Mini Rev Med Chem* 7: 1089–1096.
- Teixeira MM, Gazzinelli RT, Silva JS (2002) Chemokines, inflammation and Trypanosoma cruzi infection. *Trends Parasitol* 18: 262–265.
- Marino AP, Silva AA, Santos PV, Pinto LM, Gazzinelli RT, et al. (2005) CC-chemokine receptors: a potential therapeutic target for Trypanosoma cruzi-elicited myocarditis. *Mem Inst Oswaldo Cruz* 100 Suppl 1: 93–96.
- Gomes JA, Bahia-Oliveira LM, Rocha MO, Busek SC, Teixeira MM, et al. (2005) Type 1 chemokine receptor expression in Chagas' disease correlates with morbidity in cardiac patients. *Infect Immun* 73: 7960–7966.
- Cunha-Neto E, Dzau VJ, Allen PD, Stamatidou D, Benvenuti L, et al. (2005) Cardiac gene expression profiling provides evidence for cytokinopathy as a molecular mechanism in Chagas' disease cardiomyopathy. *Am J Pathol* 167: 305–313.

28. Groom JR, Luster AD (2011) CXCR3 ligands: redundant, collaborative and antagonistic functions. *Immunol Cell Biol* 89: 207–215.
29. Calzada JE, Nieto A, Beraun Y, Martin J (2001) Chemokine receptor CCR5 polymorphisms and Chagas' disease cardiomyopathy. *Tissue Antigens* 58: 154–158.
30. Nickel RG, Casolaro V, Wahn U, Beyer K, Barnes KC, et al. (2000) Atopic dermatitis is associated with a functional mutation in the promoter of the C-C chemokine RANTES. *J Immunol* 164: 1612–1616.
31. Sekiya T, Tsunemi Y, Miyamasu M, Ohta K, Morita A, et al. (2003) Variations in the human Th2-specific chemokine TARC gene. *Immunogenetics* 54: 742–745.
32. Jorge MT, Macedo TA, Janones RS, Carizzi DP, Heredia RA, et al. (2003) Types of arrhythmia among cases of American trypanosomiasis, compared with those in other cardiopathy patients. *Ann Trop Med Parasitol* 97: 139–148.
33. Fonseca SG, Reis MM, Coelho V, Nogueira LG, Monteiro SM, et al. (2007) Locally produced survival cytokines IL-15 and IL-7 may be associated to the predominance of CD8+ T cells at heart lesions of human chronic Chagas disease cardiomyopathy. *Scand J Immunol* 66: 362–371.
34. Bustin SA, Benes V, Garson JA, Hellemans J, Huggett J, et al. (2009) The MIQE guidelines: minimum information for publication of quantitative real-time PCR experiments. *Clin Chem* 55: 611–622.
35. Bruck P, Bartsch W, Penna-Martinez M, Kahles H, Seidl C, et al. (2009) Polymorphisms of CXCR3-binding chemokines in type 1 diabetes. *Hum Immunol* 70: 552–555.
36. Soto-Sanchez J, Santos-Juanes J, Coto-Segura P, Coto E, Diaz M, et al. (2010) Genetic variation at the CCR5/CCR2 gene cluster and risk of psoriasis and psoriatic arthritis. *Cytokine* 50: 114–116.
37. Zhenakova A, Alizadeh BZ, Eerligh P, Hanifi-Moghaddam P, Schloot NC, et al. (2006) Genetic variants of RANTES are associated with serum RANTES level and protection for type 1 diabetes. *Genes Immun* 7: 544–549.
38. Reis DD, Jones EM, Tostes S, Lopes ER, Chapadeiro E, et al. (1993) Expression of major histocompatibility complex antigens and adhesion molecules in hearts of patients with chronic Chagas' disease. *Am J Trop Med Hyg* 49: 192–200.
39. Sallusto F, Mackay CR, Lanzavecchia A (2000) The role of chemokine receptors in primary, effector, and memory immune responses. *Annu Rev Immunol* 18: 593–620.
40. Yates CC, Whaley D, Kulasekaran P, Hancock WW, Lu B, et al. (2007) Delayed and deficient dermal maturation in mice lacking the CXCR3 ELR-negative CXC chemokine receptor. *Am J Pathol* 171: 484–495.
41. Sallusto F, Lanzavecchia A, Mackay CR (1998) Chemokines and chemokine receptors in T-cell priming and Th1/Th2-mediated responses. *Immunol Today* 19: 568–574.
42. Bonecchi R, Bianchi G, Bordignon PP, D'Ambrosio D, Lang R, et al. (1998) Differential expression of chemokine receptors and chemotactic responsiveness of type 1 T helper cells (Th1s) and Th2s. *J Exp Med* 187: 129–134.
43. D'Ambrosio D, Iellem A, Bonecchi R, Mazzeo D, Sozzani S, et al. (1998) Selective up-regulation of chemokine receptors CCR4 and CCR8 upon activation of polarized human type 2 Th cells. *J Immunol* 161: 5111–5115.
44. Forster R, Davalos-Misslitz AC, Rot A (2008) CCR7 and its ligands: balancing immunity and tolerance. *Nat Rev Immunol* 8: 362–371.
45. Abe R, Donnelly SC, Peng T, Bucala R, Metz CN (2001) Peripheral blood fibrocytes: differentiation pathway and migration to wound sites. *J Immunol* 166: 7556–7562.
46. Riol-Blanco L, Sanchez-Sanchez N, Torres A, Tejedor A, Narumiya S, et al. (2005) The chemokine receptor CCR7 activates in dendritic cells two signaling modules that independently regulate chemotaxis and migratory speed. *J Immunol* 174: 4070–4080.
47. Farber JM (1997) Mig and IP-10: CXC chemokines that target lymphocytes. *J Leukoc Biol* 61: 246–257.
48. Bujak M, Dobaczewski M, Gonzalez-Quesada C, Xia Y, Leucker T, et al. (2009) Induction of the CXC chemokine interferon-gamma-inducible protein 10 regulates the reparative response following myocardial infarction. *Circ Res* 105: 973–983.
49. Appay V, Rowland-Jones SL (2001) RANTES: a versatile and controversial chemokine. *Trends Immunol* 22: 83–87.
50. Baggolini M, Dewald B, Moser B (1994) Interleukin-8 and related chemotactic cytokines—CXC and CC chemokines. *Adv Immunol* 55: 97–179.
51. Machado FS, Martins GA, Aliberti JC, Mestriner FL, Cunha FQ, et al. (2000) Trypanosoma cruzi-infected cardiomyocytes produce chemokines and cytokines that trigger potent nitric oxide-dependent trypanocidal activity. *Circulation* 102: 3003–3008.
52. Marino AP, da Silva A, dos Santos P, Pinto LM, Gazzinelli RT, et al. (2004) Regulated on activation, normal T cell expressed and secreted (RANTES) antagonist (Met-RANTES) controls the early phase of Trypanosoma cruzi-elicited myocarditis. *Circulation* 110: 1443–1449.
53. Guedes PM, Veloso VM, Talvani A, Diniz LF, Caldas IS, et al. (2010) Increased type 1 chemokine expression in experimental Chagas disease correlates with cardiac pathology in beagle dogs. *Vet Immunol Immunopathol* 138: 106–113.
54. Soares MB, de Lima RS, Rocha LL, Vasconcelos JF, Rogatto SR, et al. (2010) Gene expression changes associated with myocarditis and fibrosis in hearts of mice with chronic chagasic cardiomyopathy. *J Infect Dis* 202: 416–426.
55. Manque PA, Probst CM, Pereira MC, Rampazzo RC, Ozaki LS, et al. (2011) Trypanosoma cruzi infection induces a global host cell response in cardiomyocytes. *Infect Immun* 79: 1855–1862.
56. Gong JH, Nicholls EF, Elliott MR, Brown KL, Hokamp K, et al. (2012) G-protein-coupled receptor independent, immunomodulatory properties of chemokine CXCL9. *Cell Immunol* 261: 105–113.
57. Ramasawmy R, Cunha-Neto E, Fae KC, Martello FG, Muller NG, et al. (2006) The monocyte chemoattractant protein-1 gene polymorphism is associated with cardiomyopathy in human chagas disease. *Clin Infect Dis* 43: 305–311.
58. Florez O, Martin J, Gonzalez CI (2012) Genetic variants in the chemokines and chemokine receptors in Chagas disease. *Hum Immunol*.
59. Bilate AM, Cunha-Neto E (2008) Chagas disease cardiomyopathy: current concepts of an old disease. *Rev Inst Med Trop Sao Paulo* 50: 67–74.
60. Drigo SA, Cunha-Neto E, Ianni B, Cardoso MR, Braga PE, et al. (2006) TNF gene polymorphisms are associated with reduced survival in severe Chagas' disease cardiomyopathy patients. *Microbes Infect* 8: 598–603.
61. Lee HH, Farber JM (1996) Localization of the gene for the human MIG cytokine on chromosome 4q21 adjacent to INP10 reveals a chemokine "mini-cluster". *Cytogenet Cell Genet* 74: 255–258.
62. McDermott DH, Zimmerman PA, Guignard F, Kleeberger CA, Leitman SF, et al. (1998) CCR5 promoter polymorphism and HIV-1 disease progression. Multicenter AIDS Cohort Study (MACS). *Lancet* 352: 866–870.
63. Lacher M, Kappler R, Berkholtz S, Baurecht H, von Schweinitz D, et al. (2007) Association of a CXCL9 polymorphism with pediatric Crohn's disease. *Biochem Biophys Res Commun* 363: 701–707.
64. Deng G, Zhou G, Zhang R, Zhai Y, Zhao W, et al. (2008) Regulatory polymorphisms in the promoter of CXCL10 gene and disease progression in male hepatitis B virus carriers. *Gastroenterology* 134: 716–726.
65. Klich I, Fendler W, Wyka K, Mlynarski W (2011) Effect of the IP10 (CXCL10) and HLA genotype on the risk of type 1 diabetes in children. *Pediatr Endocrinol Diabetes Metab* 17: 10–13.
66. Erdel M, Theurl M, Meyer M, Duba HC, Utermann G, et al. (2001) High-resolution mapping of the human 4q21 and the mouse 5E3 SCYB chemokine cluster by fiber-fluorescence in situ hybridization. *Immunogenetics* 53: 611–615.
67. Troia-Cancio P, Asmuth DM (2011) Lessons from maraviroc clinical trials. *Expert Rev Anti Infect Ther* 9: 649–651.
68. Hart AL, Ng SC, Mann E, Al-Hassi HO, Bernardo D, et al. (2010) Homing of immune cells: role in homeostasis and intestinal inflammation. *Inflamm Bowel Dis* 16: 1969–1977.
69. Kakuta Y, Okumi M, Miyagawa S, Tsutahara K, Abe T, et al. (2012) Blocking of CCR5 and CXCR3 suppresses the infiltration of macrophages in acute renal allograft rejection. *Transplantation* 93: 24–31.
